# Supplementary material for: Curcumin and Curcuma longa L. extract ameliorate lipid accumulation through the regulation of the endoplasmic reticulum redox and ER stress
Source: PubMed Central journal article supplement (PMC5529367; doi:10.1038/s41598-017-06872-y), 2017-07-26
Supplement: 41598_2017_6872_MOESM1_ESM.pdf [file 41598_2017_6872_MOESM1_ESM.pdf]

# **Curcumin and *Curcuma longa* L. extract ameliorate lipid accumulation through the regulation of the endoplasmic reticulum redox and ER stress**

Hwa-Young Lee<sup>1§</sup>, Seung-Wook Kim<sup>2§</sup>, Geum-Hwa Lee<sup>1</sup>, Min-Kyung Choi<sup>1</sup>, Han-Wool Chung<sup>1</sup>, Yong-Chul Lee<sup>3</sup>, Hyung-Ryong Kim<sup>4</sup>, Ho Jeong Kwon<sup>2\*</sup>, Han-Jung Chae<sup>1\*</sup>

<sup>1</sup>Department of Pharmacology and New Drug Development Institute, Chonbuk National University Medical School, Jeonju, Chonbuk 561-180, Republic of Korea;

<sup>2</sup>Chemical Genomics Global Research Laboratory, Department of Biotechnology, College of Life Science and Biotechnology, Yonsei University, Seoul 120-752, Republic of Korea; <sup>3</sup>Department of Internal Medicine, School of Medicine, Chonbuk National University, Jeonju 560-182, Republic of Korea; <sup>4</sup>Department of Dental Pharmacology and Wonkwang Dental Research Institute, School of Dentistry, Wonkwang University, Iksan, Chonbuk, South Korea

\*Correspondence to Ho Jeong Kwon, Chemical Genomics Global Research Laboratory, Department of Biotechnology, College of Life Science and Biotechnology, Yonsei University, Seoul 120-752, Republic of Korea, kwonhj@yonsei.ac.kr; Han-Jung Chae, Department of Pharmacology, New Drug Development Institute, Chonbuk National University, Medical School, Jeonju, Republic of Korea, Tel: 82-63-270-3092, Fax: 82-63-275-2855, E-mail: hjchae@jbnu.ac.kr

§These authors contributed equally to this work.

**Supplementary Fig 1. Full scan mass spectrum of curcuminoids:** (a) curcumin molecular weight (368.3), (b) bisdemethoxycurcumin (molecular weight 308.3), and (c) demethoxycurcumin (molecular weight 338.4). (d) LC-MS/MS chromatogram: *Curcuma longa* L. extract.

**Supplementary Fig 2. Curcumin and *Curcuma longa* L. extract regulate hepatic injury in rats treated acutely or chronically with CCl<sub>4</sub>.** Rats were intraperitoneally treated with CCl<sub>4</sub> (0.1 mL/100 g body weight) one time for 1 day or every other day for 4 weeks. Curcumin (200 mg/kg) or *Curcuma longa* extract (100, 200, and 300 mg/kg) was given once daily. Representative images of liver sections from each group stained with (a) hematoxylin-eosin and (b) Sirius red collagen staining. Scale bars = 50 μm. The experiments were repeated three times using tissues from at least three different rats. #*P* < 0.05 vs. the CCl<sub>4</sub> group (n =10 rats per group). Cur: curcumin, CL: *Curcuma longa* L., CV: central vein.

**Supplementary Fig 3. Curcumin and *Curcuma longa* L. extract regulate lipid accumulation in rats treated acutely or chronically with CCl<sub>4</sub>.** Rats were intraperitoneally treated with CCl<sub>4</sub> (0.1 mL/100 g body weight) one time for (a-d) 1 day or (e-h) every other day for 4 weeks. Curcumin (200 mg/kg) or *Curcuma longa* L. extract (100, 200, and 300 mg/kg) was given once daily. (a, e) Six-hour fasting serum triglyceride, (b, f) total cholesterol, (c, g) LDL-cholesterol, and (d, h) HDL-cholesterol levels were measured in the 1 day and 4 week CCl<sub>4</sub>-treated rats. The experiments were repeated three times using tissues from at least three different rats. ###*P* < 0.001 vs. the control group; \**P* < 0.01 vs. the CCl<sub>4</sub> group (n =10 rats per group). Cur: curcumin, CL: *Curcuma longa* L.

**Supplementary Fig 4. Curcumin and *Curcuma longa* L. extract regulate hepatic lipid accumulation in rats treated acutely or chronically with CCl<sub>4</sub>.** Rats were intraperitoneally treated with CCl<sub>4</sub> (0.1 mL/100 g body weight) (a) one time for 1 day or (b) every other day for 4 weeks. Curcumin (200 mg/kg) or *Curcuma longa* L. extract (100, 200, and 300 mg/kg) was given once daily. Six-hour fasting liver HDL-cholesterol levels were measured in 1 day and 4 week CCl<sub>4</sub>-treated rats. The experiments were repeated three times using tissues from at least three different rats. #*P* < 0.05 vs. the CCl<sub>4</sub> group (n =10 rats per group). Cur: curcumin, CL: *Curcuma longa* L., CV: central vein.

**Supplementary Fig 5. Curcumin and *Curcuma longa* L. extract regulate antioxidant activity in rats treated acutely or chronically with CCl<sub>4</sub>.** Rats were intraperitoneally treated with CCl<sub>4</sub> (0.1 mL/100 g body weight) one time for 1 day or every other day for 4 weeks. Curcumin (200 mg/kg) or *Curcuma longa* L. extract (100, 200, or 300 mg/kg) was given once daily. After the livers were isolated, (a, b) GSH/GSSG ratios and (c, d) GPX levels were measured. The experiments were repeated three times using tissues from at least three different rats. #*P* < 0.05, ##*P* < 0.01, ###*P* < 0.001 vs. the control group; \**P* < 0.01 vs. the CCl<sub>4</sub> group (n =10 rats per group). Cur: curcumin, CL: *Curcuma longa* L.

**Supplementary Fig 6. Curcumin and *Curcuma longa* L. extract regulate antioxidant activity in rats treated acutely or chronically with CCl<sub>4</sub>.** Rats were intraperitoneally treated with CCl<sub>4</sub> (0.1 mL/100 g body weight) one time for 1 day or every other day for 4 weeks. Curcumin (200 mg/kg) or *Curcuma longa* L. extract (100, 200, and 300 mg/kg) was given once daily. (a, b) After the livers were isolated, SOD levels were measured. The experiments were repeated three times using tissues from at least three different rats. #*P* < 0.05 vs. the control group; \**P* < 0.01 vs. the CCl<sub>4</sub> group (n =10 rats per group). Cur: curcumin, CL: *Curcuma longa* L.

**Supplementary Fig 7. Curcumin and *Curcuma longa* L. extract regulate CCl<sub>4</sub>-induced ER morphological alteration.** Representative electron microscopy images with clear ER morphology. Cur: curcumin, CL: *Curcuma longa* L.

**Supplementary Fig 8. CCl<sub>4</sub> induces lipid peroxidation and ER lipid peroxidation in primary hepatocytes.** Mouse primary hepatocytes were exposed to 0.5% CCl<sub>4</sub> for 0, 1, 2, 4, 6, 12, or 24 h. (a) Lipid peroxidation analysis was performed in hepatocytes treated with CCl<sub>4</sub> for 0, 1, 2, 4, 6, 12 or 24 h. (b) Lipid peroxidation analysis was performed the ER fractions from hepatocytes treated with CCl<sub>4</sub> for 0, 1, 2, 4, 6, 12 or 24 h. #*P* < 0.05 vs. the control group. Cur: curcumin, CL: *Curcuma longa* L, 4-PBA: 4-Phenylbutyric acid, TUDCA: Tauroursodeoxycholic acid, NAC: N-Acetyl-L-cysteine.

**Supplementary Fig 9. Curcumin and *Curcuma longa* L. extract have no effect on the ROS and ER stress response in normal hepatocytes.** Mouse primary hepatocytes were exposed to 2 μM curcumin, 25 μM CL, 5 mM 4-PBA, 500 μg/mL TUDCA, or 2 mM NAC for 6 h or 12 h. Lipid peroxidation analysis (a) and DHE staining (b) were performed in the treated hepatocytes. (c) Immunoblotting was performed using antibodies against anti-GRP78, CHOP, p-eIF2α, eIF2α, p-PERK, PERK, p-JNK, JNK, p-IRE-1α, IRE1-α, and β-actin. #*P* < 0.05 vs. the control group. Cur: curcumin, CL: *Curcuma longa* L, 4-PBA: 4-Phenylbutyric acid, TUDCA: Tauroursodeoxycholic acid, NAC: N-Acetyl-L-cysteine.

# Supplementary Figure 1

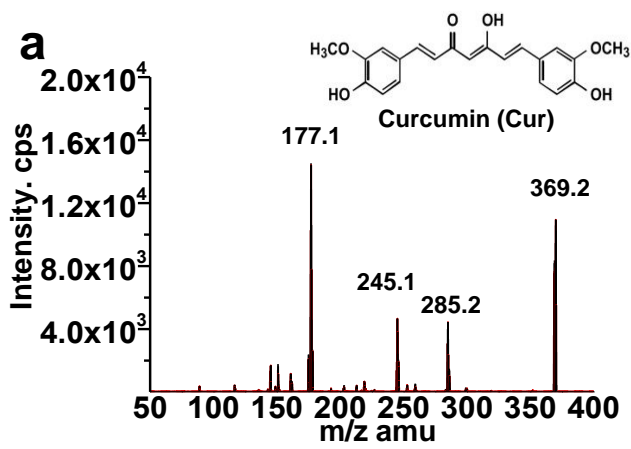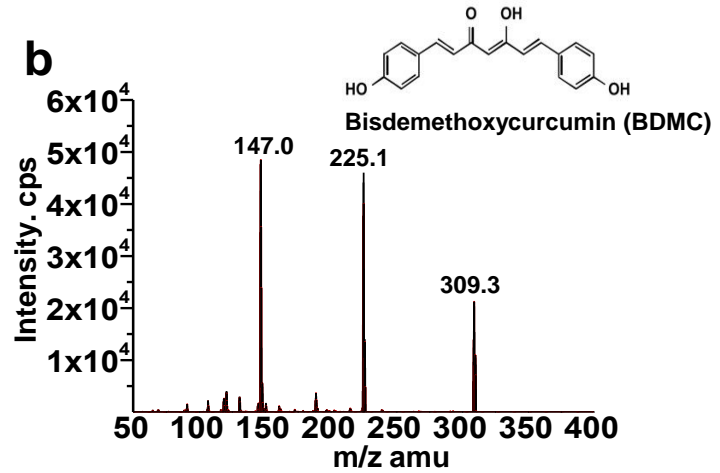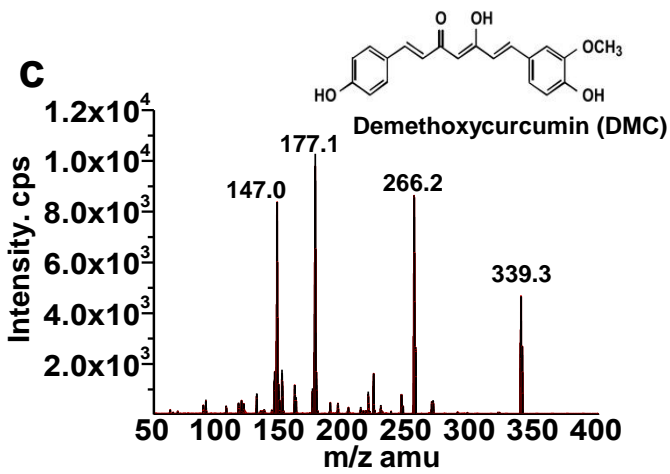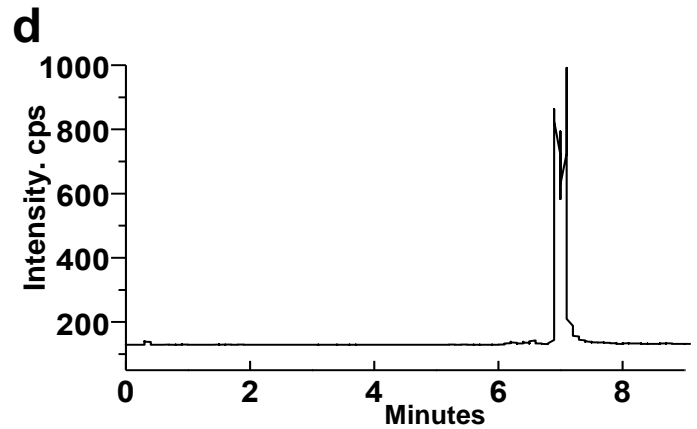

# Supplementary Figure 2

**a**

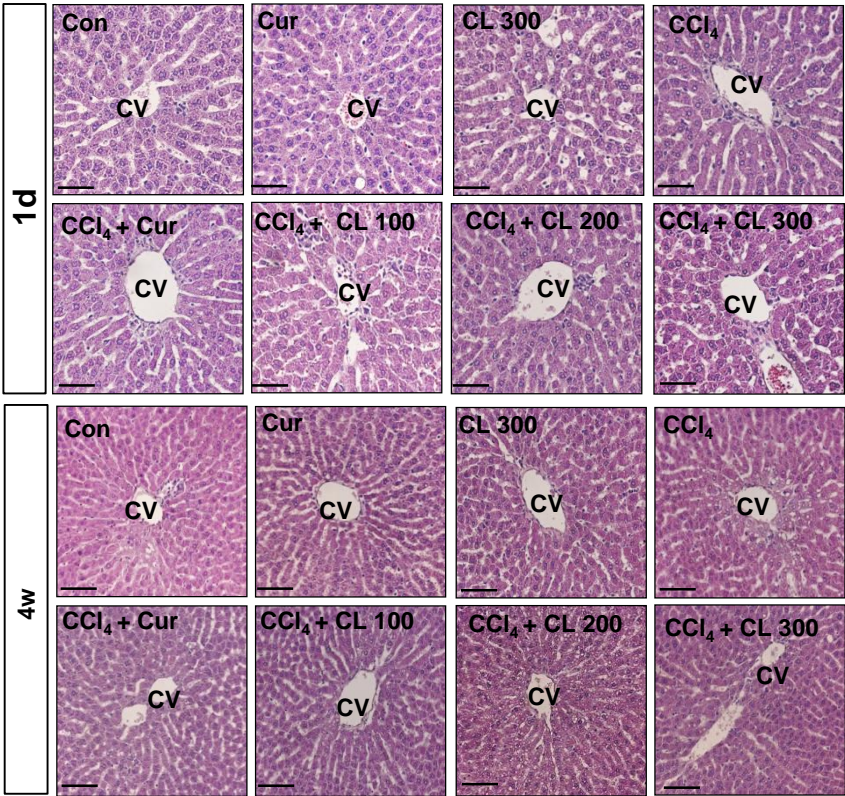

**b**

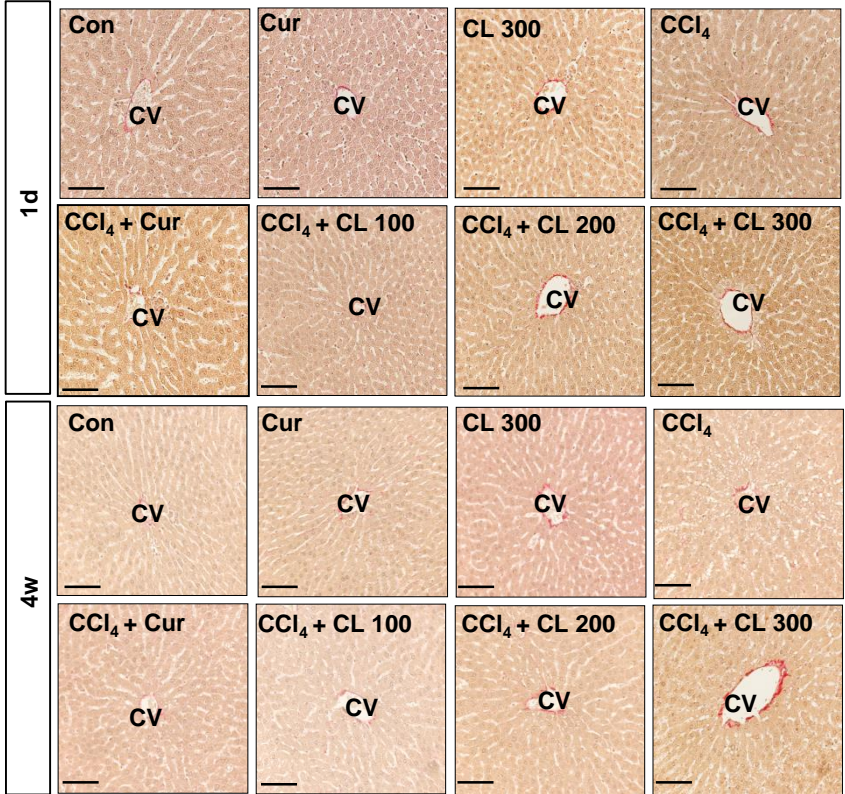

# Supplementary Figure 3

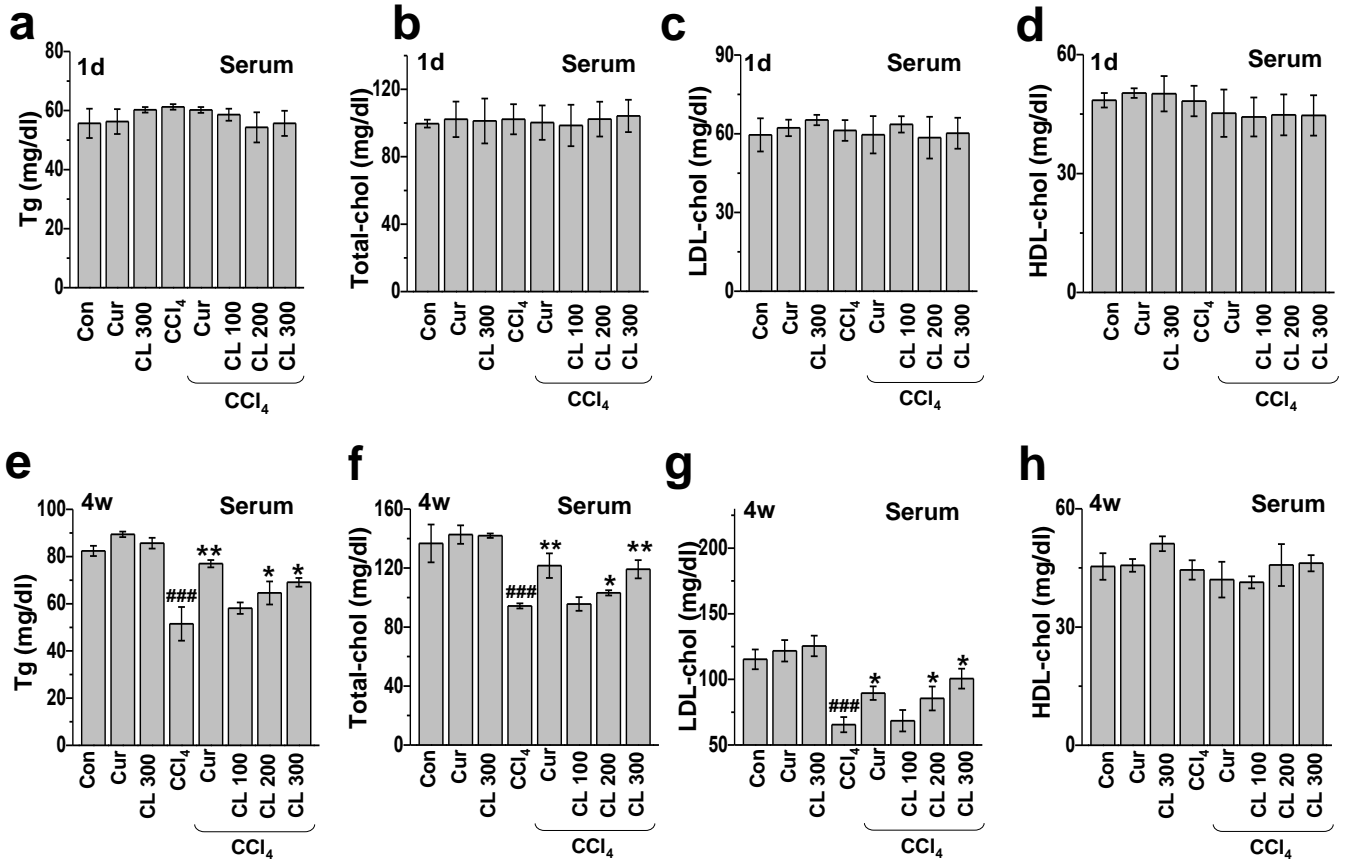

# Supplementary Figure 4

**a**

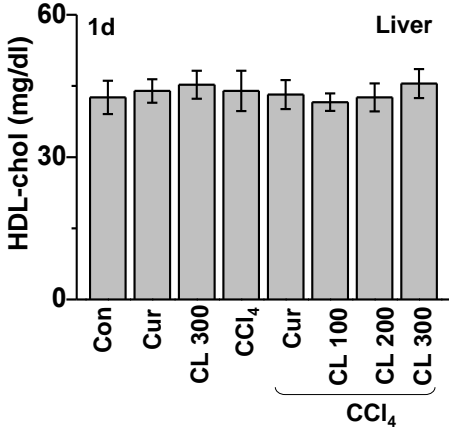

**b**

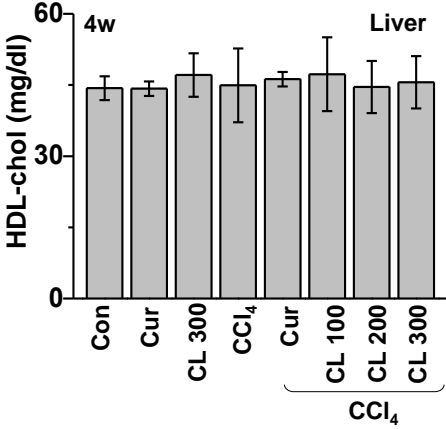



# Supplementary Figure 5

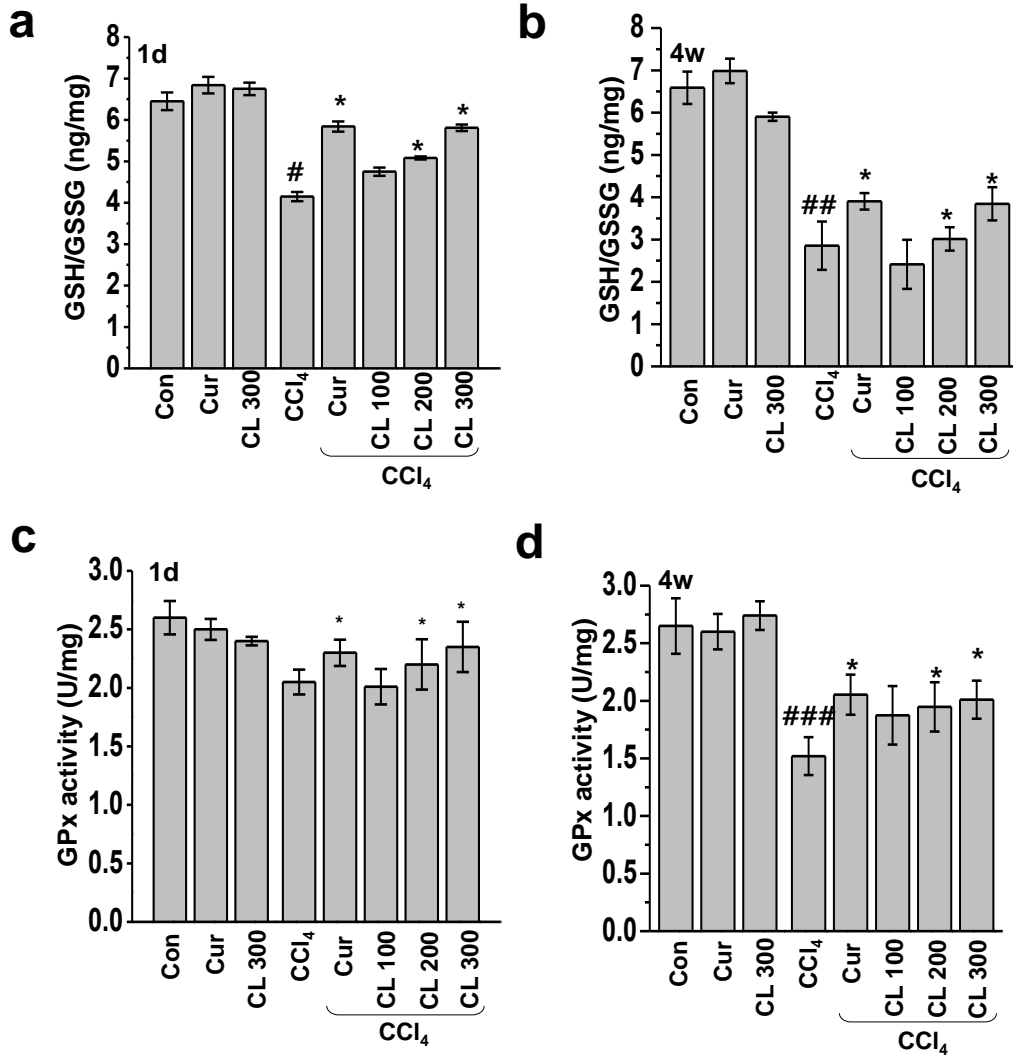

# Supplementary Figure 6

**a**

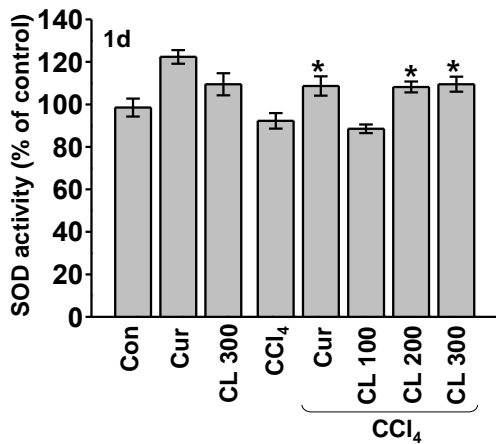

**b**

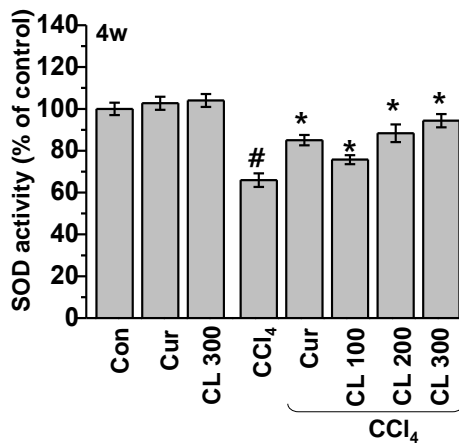

# Supplementary Figure 7

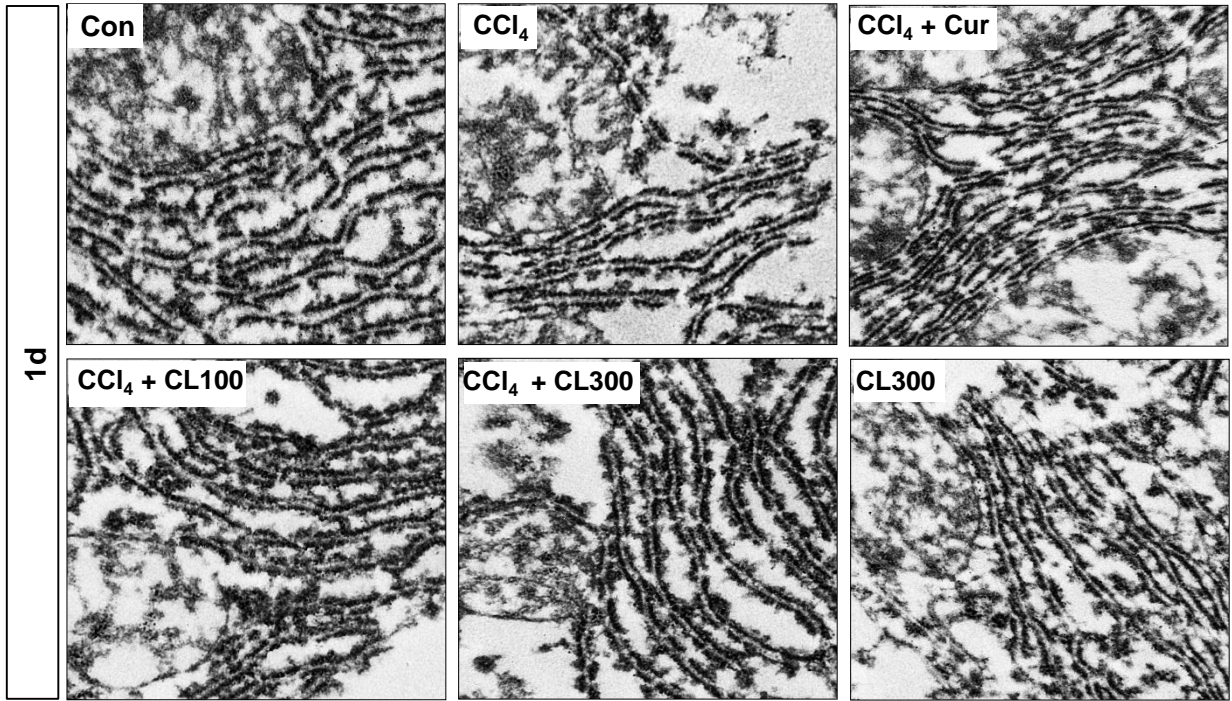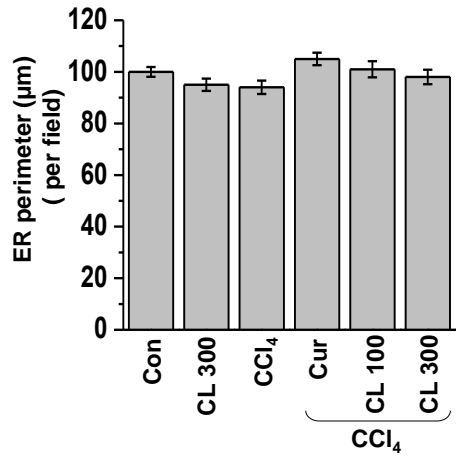

# Supplementary Figure 8

**a**

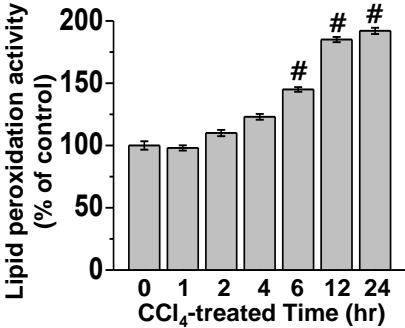

**b**

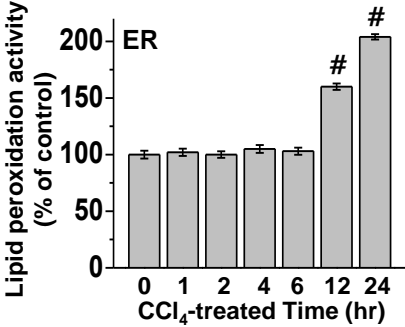

# Supplementary Figure 9

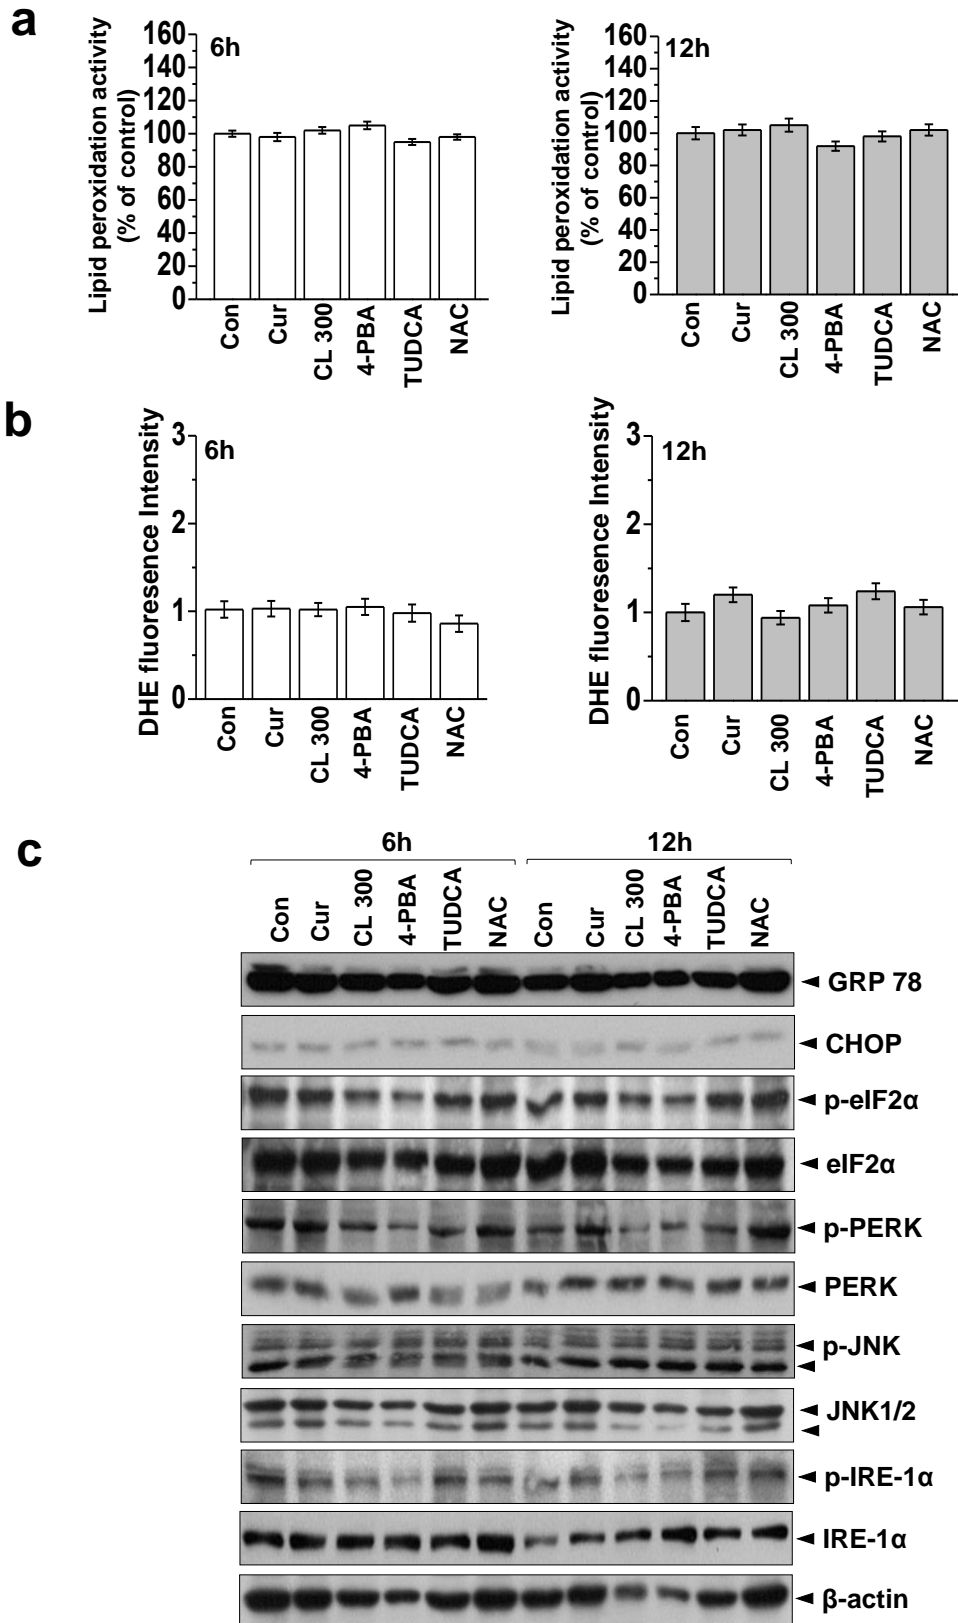

**Supplementary Table 1 Analysis of *Curcuma longa* L. extract (India, Rajapuri)**

| <b>Component</b>            | <b>mg/100 g</b> |
|-----------------------------|-----------------|
| <b>Bisdemethoxycurcumin</b> | 1283.5 ± 8.5    |
| <b>Demethoxycurcumin</b>    | 1284.6 ± 7.0    |
| <b>Curcumin</b>             | 2269.2 ± 12.3   |
| <b>Curcuminoids</b>         | 4837.2 ± 20.9   |

**Supplementary Table 2 LC–MS/MS conditions for the acquisition in MRM ESI positive mode for the target compounds of *Curcuma longa* L. extract (India, Rajapuri).**

| Compound              | Retention time (min) | Parent ion (m/z) | Transition ion (m/z) | Fragmentor Voltage (eV) | Collision Energy (eV) |
|-----------------------|----------------------|------------------|----------------------|-------------------------|-----------------------|
| Bisdemethoxy curcumin | 7.0                  | 309.1            | 225.1 <sup>a</sup>   | 110                     | 10                    |
|                       |                      |                  | 147.0 <sup>b</sup>   | 110                     | 10                    |
| Demethoxy curcumin    | 7.3                  | 339.1            | 266.2                | 110                     | 10                    |
|                       |                      |                  | 177.1                | 110                     | 10                    |
| Curcumin              | 7.1                  | 369.1            | 177.1                | 90                      | 10                    |
|                       |                      |                  | 285.2                | 90                      | 10                    |

a : Quantitation ion, b : Confirmation ion

## Supplementary Table 3

| Groups                    | 1d                  |                 |             | 4w                  |                 |                        |
|---------------------------|---------------------|-----------------|-------------|---------------------|-----------------|------------------------|
|                           | Food Intake (g/day) | Body weight (g) |             | Food Intake (g/day) | Body weight (g) |                        |
|                           |                     | Initial         | Weight gain |                     | Initial         | Weight gain            |
| Con                       | 22.1±3.1            | 345.2±9.1       | -0.2±8.6    | 42.3±2.2            | 328.2±20.3      | 39.3±9.6               |
| Cur                       | 23.2±3.3            | 344.3±12.6      | 0.7±9.5     | 45.8±1.8            | 330.5±15.9      | 21.8±14.2              |
| CL 300                    | 22.0±2.3            | 340.3±14.3      | 0.7±12.0    | 45.4±10.2           | 330.5±17.9      | 19.6±12.6              |
| CCl <sub>4</sub>          | 22.3±3.2            | 340.6±11.5      | 7.4±11.6    | 45.2±9.0            | 328.0±15.3      | 74.2±10.5 <sup>#</sup> |
| CCl <sub>4</sub> + Cur    | 21.2±2.1            | 330.3±9.9       | 0.7±8.6     | 42.2±8.6            | 327.4±17.9      | 46.6±13.0              |
| CCl <sub>4</sub> + CL 100 | 19.9±3.2            | 330.9±12.7      | -0.9±5.7    | 47.1±9.1            | 327.1±18.6      | 71.8±12.0*             |
| CCl <sub>4</sub> + CL 200 | 24.6±2.0            | 321.0±18.2      | 1.0±9.0     | 42.8±3.9            | 320.3±21.4      | 66.8±9.2*              |
| CCl <sub>4</sub> + CL 300 | 23.1±1.3            | 331.3±14.6      | 2.7±13.3    | 43.0±8.7            | 331.4±16.3      | 45.2±8.6*              |

Con; control, Cur; curcumin, CL 100; *Curcuma longa* L. 100 mg/kg, CL 200; *Curcuma longa* L. 200 mg/kg, CL 300; *Curcuma longa* L. 300 mg/kg, <sup>#</sup>*P* < 0.05 vs. the control group; \**P* < 0.01 vs. the CCl<sub>4</sub> group
